# Supplementary material for: The Full-Size ABCG Transporter of Medicago truncatula Is Involved in Strigolactone Secretion, Affecting Arbuscular Mycorrhiza
Source: PubMed Central journal article supplement (PMC7019051; doi:10.3389/fpls.2020.00018), 2020-02-07
Supplement: DataSheet_1.pdf [file DataSheet_1.pdf]

## *Supplementary Material*

**Supplementary Table 1.** List of primers used in this study

| <b>A. Primers for real-time PCR analyses</b>                              |                                                                                                                          |
|---------------------------------------------------------------------------|--------------------------------------------------------------------------------------------------------------------------|
| <b>Genes</b>                                                              | <b>Primers</b>                                                                                                           |
| <i>MtABCG59</i>                                                           | 5'-GCATTTGGACAGGTTGCTG-3'<br>5'-GGTTCCATAGCAAGTAGAAGC-3'                                                                 |
| <i>MtABCG43</i>                                                           | 5'-CCCTTATCTAGAATACCAATATGG-5'<br>5'-TGAAGAGAAGCATTGGAGTG-3'                                                             |
| <i>MtABCG44</i>                                                           | 5'-GCAGCACACAGGTTATTATAGAG-3'<br>5'-GAATGAGGAGGACAGTATTGG-3'                                                             |
| <i>MtPT4</i>                                                              | 5'-TCCGCGAAATCTGTTATGATAACCCT-3'<br>5'-AACTGCTGCTATGAAAGCGCCT-3'                                                         |
| <i>MtBCP1*</i>                                                            | 5'-CCGGAAAGGACGTTATTCAA-3'<br>5'-TGGCTACCATGATGACTCCA-3'                                                                 |
| <i>MtCCD7</i>                                                             | 5'-TATCTCTATGCTGCAACCAC-3'<br>5'-CTCAACAACAAGAAGGTAACC-3'                                                                |
| <i>MtCCD8</i>                                                             | 5'-GATTGCCAGAGCTAAGTTCC-3'<br>5'-ATGGATTGCTATCAGCTTGC-3'                                                                 |
| <i>Mt-Actin</i>                                                           | 5'-GTACTTTCCAGCAGATGTGG-3'<br>5'-AACCTACAGACATCCAGTGG-3'                                                                 |
| <b>B. Promoter activity analyses (gene specific sequences underlined)</b> |                                                                                                                          |
| <b>DNA fragments</b>                                                      | <b>Primers</b>                                                                                                           |
| <i>PrABCG59-GUS</i><br>( <i>EcoRI/HindIII</i> )                           | 5'-atgaattca <u>TTCATATTCAAGATAGAGTCG</u> -3'<br>5'-actaagctt <u>GTATGTATTATTTTGTATTATGTACTC</u> -3'                     |
| <i>PrABCG59-NLS-GFP</i>                                                   | 5'-tagttggaatgggttcgaa <u>TTCATATTCAAGATAGAGTCG</u> -3'<br>5'-ttatggagttgggttcgaa <u>GTATGTATTATTTTGTATTATGTACTC</u> -3' |
| <b>C. Primers used for genotyping</b>                                     |                                                                                                                          |
| <b>DNA fragments</b>                                                      | <b>Primers</b>                                                                                                           |
| NF12356 WT                                                                | 5'-GTTCAATGGATACTCCGAGC-3'<br>5'-AACGGCACTAACAAGTTGC-3'                                                                  |
| NF12356 <i>mtabcg59</i>                                                   | 5'-GTTCAATGGATACTCCGAGC-3'<br>5'-GCTACCAACCAAACCAAGTC-3'                                                                 |
| NF15758 WT                                                                | 5'-GTCATAGCCTTCTTGTTCCG-3'<br>5'-GGTTCCATAGCAAGTAGAAGC-3'                                                                |
| NF15758 <i>mtabcg59</i>                                                   | 5'-GCTACCAACCAAACCAAGTC-3'<br>5'-GGTTCCATAGCAAGTAGAAGC-3'                                                                |
| <i>PaPDR1</i>                                                             | 5'-TGGAATGTATTCAGCTATGCC-3'<br>5'-AAGAATGAGAGCAACATATCCC-3'                                                              |

**D. Primers used for cloning of *MtABCG59* gDNA (gene specific sequences underlined)**

| DNA fragment                     | Primers                                                                                           |
|----------------------------------|---------------------------------------------------------------------------------------------------|
| <i>MtABCG59</i> <i>Sall/NotI</i> | 5'-gcgtcgac <u>ATGGAAGGTGGTGA</u> ACTGAG-3'<br>5'-aagcggccgc <u>TACAATTTGGACAA AATGCTTATC</u> -3' |

**E. Primers flanking the T-DNA insertion sites**

| DNA fragment            | Primers                                                   |
|-------------------------|-----------------------------------------------------------|
| <i>mtabcg59</i> mutants | 5'-GTTCAATGGATACTCCGAGC-3'<br>5'-GGTTCCATAGCAAGTAGAAGC-3' |

\* primers from (Zhang et al., 2015)

**Supplementary Table 2. Optimized fertilizer solution concentrations for legumes\***

| Compound                                         | Final concentration |
|--------------------------------------------------|---------------------|
| <i>MgSO<sub>4</sub></i>                          | 2 mM                |
| <i>K<sub>2</sub>SO<sub>4</sub></i>               | 4.9 mM              |
| <i>KCl</i>                                       | 1.3 mM              |
| <i>KH<sub>2</sub>PO<sub>4</sub></i>              | 2 mM                |
| <i>KNO<sub>3</sub></i>                           | 10 mM               |
| <i>NH<sub>4</sub>H<sub>2</sub>PO<sub>4</sub></i> | 2 mM                |
| <i>Ca (NO<sub>3</sub>)<sub>2</sub></i>           | 2 mM                |
| <i>FeSO<sub>4</sub></i>                          | 0.1 mM              |
| <i>Na<sub>2</sub>EDTA</i>                        | 0.1 mM              |
| <i>MnSO<sub>4</sub></i>                          | 83 μM               |
| <i>MnCl<sub>2</sub></i>                          | 23 μM               |
| <i>KJ</i>                                        | 5 μM                |
| <i>ZnSO<sub>4</sub></i>                          | 30 μM               |
| <i>CoCl<sub>2</sub></i>                          | 0.1 μM              |
| <i>CuSO<sub>4</sub></i>                          | 0.32 μM             |
| <i>H<sub>3</sub>BO<sub>3</sub></i>               | 0.1 μM              |
| <i>Na<sub>2</sub>MoO<sub>4</sub></i>             | 1 μM                |

\* modified PFN nutrient solution (Strozycki et al., 2003).

**Supplementary Table 3.** Accession numbers of the *Medicago truncatula* full-size ABCG genes (*PDRs*)

| <i>Name</i>            | <i>Name*</i> | <i>Locus</i>  |
|------------------------|--------------|---------------|
| <b><i>MtABCG37</i></b> | MtPDR1       | medtr7g098750 |
| <b><i>MtABCG38</i></b> | MtPDR2       | medtr7g098740 |
| <b><i>MtABCG39</i></b> | MtPDR3       | medtr7g098760 |
| <b><i>MtABCG40</i></b> | MtPDR4       | medtr7g098300 |
| <b><i>MtABCG41</i></b> | MtPDR5       | medtr7g098800 |
| <b><i>MtABCG42</i></b> | MtPDR6       | medtr7g098780 |
| <b><i>MtABCG43</i></b> | MtPDR7       | medtr1g011640 |
| <b><i>MtABCG44</i></b> | MtPDR8       | medtr1g011650 |
| <b><i>MtABCG45</i></b> | MtPDR9       | medtr2g102640 |
| <b><i>MtABCG46</i></b> | MtPDR10      | medtr2g102670 |
| <b><i>MtABCG47</i></b> | MtPDR11      | medtr2g102660 |
| <b><i>MtABCG48</i></b> | MtPDR12      | medtr7g104100 |
| <b><i>MtABCG49</i></b> | MtPDR13      | medtr7g104110 |
| <b><i>MtABCG50</i></b> | MtPDR14      | medtr7g104130 |
| <b><i>MtABCG51</i></b> | MtPDR15      | medtr4g123850 |
| <b><i>MtABCG52</i></b> | MtPDR16      | medtr8g014360 |
| <b><i>MtABCG53</i></b> | MtPDR17      | medtr5g070320 |
| <b><i>MtABCG54</i></b> | MtPDR18      | medtr2g101090 |
| <b><i>MtABCG55</i></b> | MtPDR19      | medtr4g113070 |
| <b><i>MtABCG56</i></b> | MtPDR20      | medtr7g098320 |
| <b><i>MtABCG57</i></b> | MtPDR21      | medtr7g098370 |
| <b><i>MtABCG58</i></b> | MtPDR22      | medtr7g098890 |
| <b><i>MtABCG59</i></b> | MtPDR23      | medtr3g107870 |
| <b><i>MtABCG60</i></b> | MtPDR24      | medtr7g104150 |

\* MtPDR1-MtPDR24 (Banasiak and Jasinski, 2014), *Medicago* PDR proteins were renamed according to (Verrier et al., 2008).

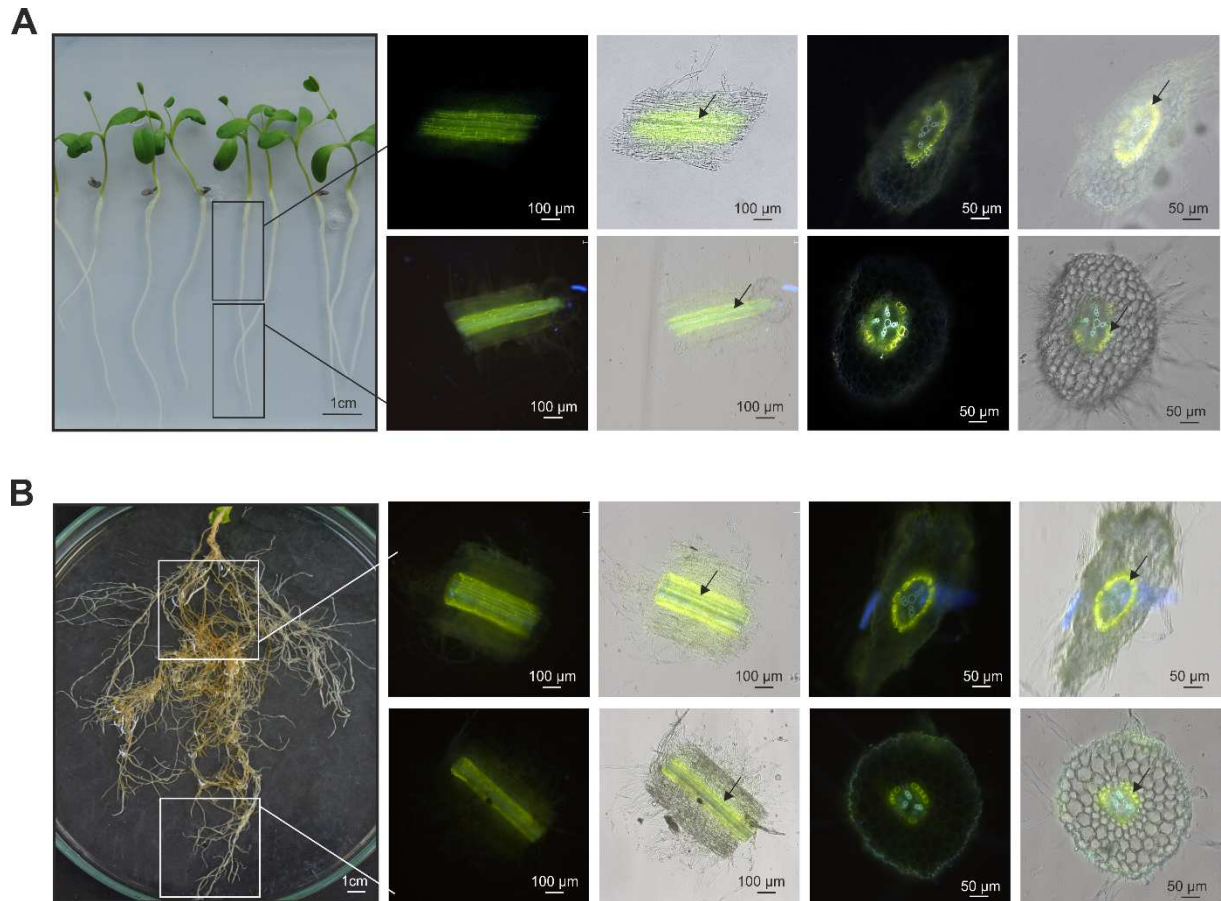

**Supplementary Figure 1. Suberin staining in *Medicago truncatula* roots.** (A-B) Fluorol Yellow 088 staining of suberin only within the endodermis in roots of 7-day-old *Medicago truncatula* seedlings grown on agar plates (A) and the roots of 6-week-old *M. truncatula* grown in pots (B). Rectangles indicate the position in the root that the fragments/sections were sourced from.

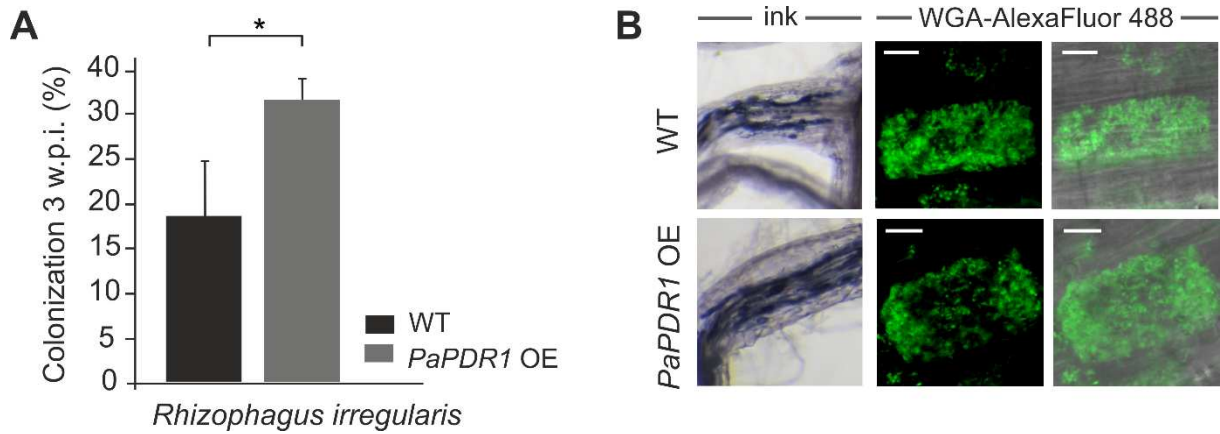

**Supplementary Figure 2. Mycorrhizal phenotype of the *Medicago truncatula* plants overexpressing (OE) the *PaPDR1*.** (A) Mycorrhizal colonization of *M. truncatula* control (WT) and *PaPDR1* OE roots 3 weeks after inoculation with *Rhizophagus irregularis*. The percentage of the root length colonized by the mycorrhizal fungi is shown. Data represent the means  $\pm$  SE of three independent biological experiments (i.e. 3 pools of 3 plants each). Significant differences from the control plants were determined by Student's t-test and are indicated by: \*  $P < 0.05$ . (B) Arbuscules formed in the WT and *PaPDR1* OE plants were morphologically similar. Ink-staining of fungal structures (left panel), WGA-AlexaFluor 488 staining of arbuscules (right panel), scale bar, 10  $\mu$ m.

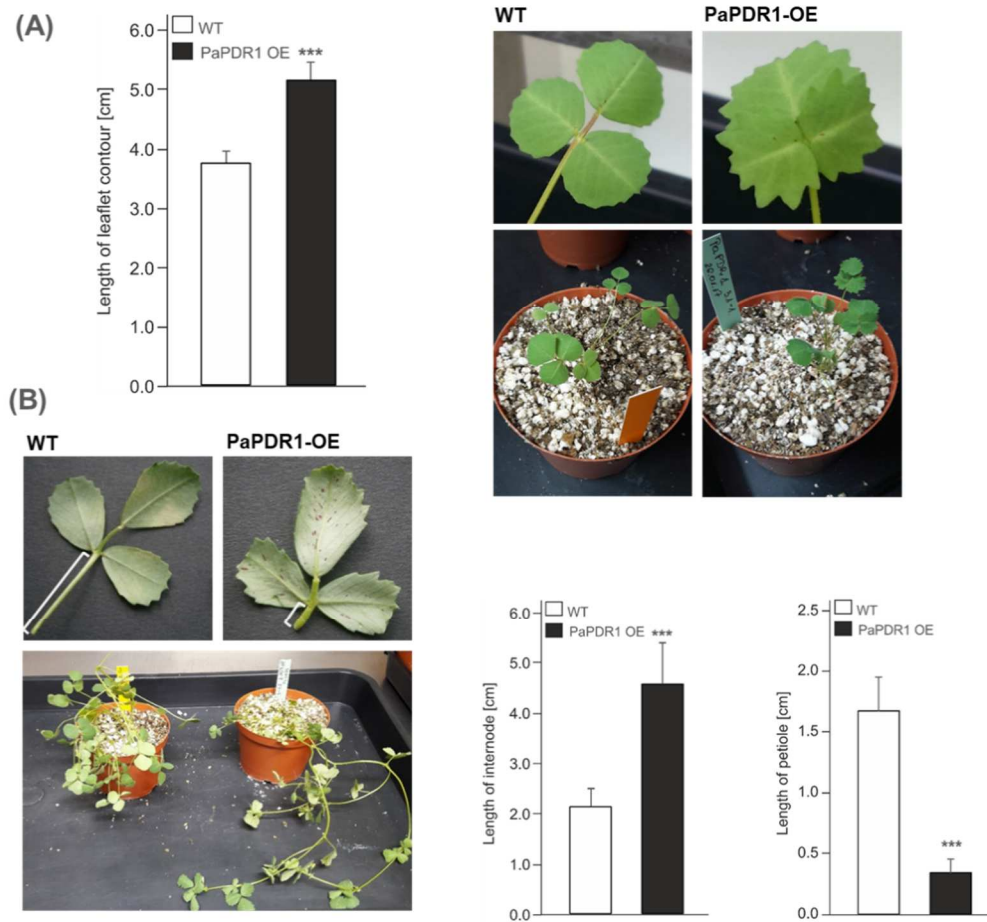

**Supplementary Figure 3. Aboveground phenotype of the *Medicago truncatula* plants overexpressing (OE) *PaPDR1*.** (A) Leaflet serration phenotypes of the 3-week-old plants. Length of the leaflet contour corresponds to the mean  $\pm$  SD of 6 leaflets. (B) Shoot architecture of two-month-old plants. Length of the internodes and petioles correspond to the mean  $\pm$  SD of  $n = 20$  and  $n = 25$ , respectively. Significant differences from the WT plants were determined by Student's t-test and are indicated by: \*\*\*  $P < 0.001$ .

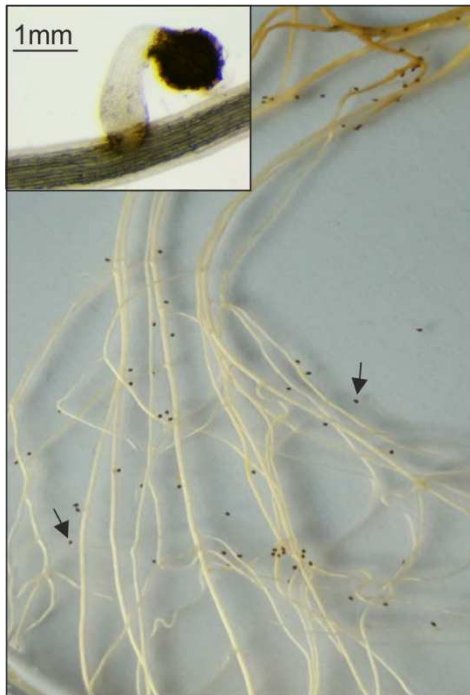

**Supplementary Figure 4. Rhizotron Petri dish system.** Germination of *Phelipanche ramosa* seeds exposed to *Medicago* roots exudates. The off root seeds are shown by arrows and the zoom-in picture represents on root germinating seed.

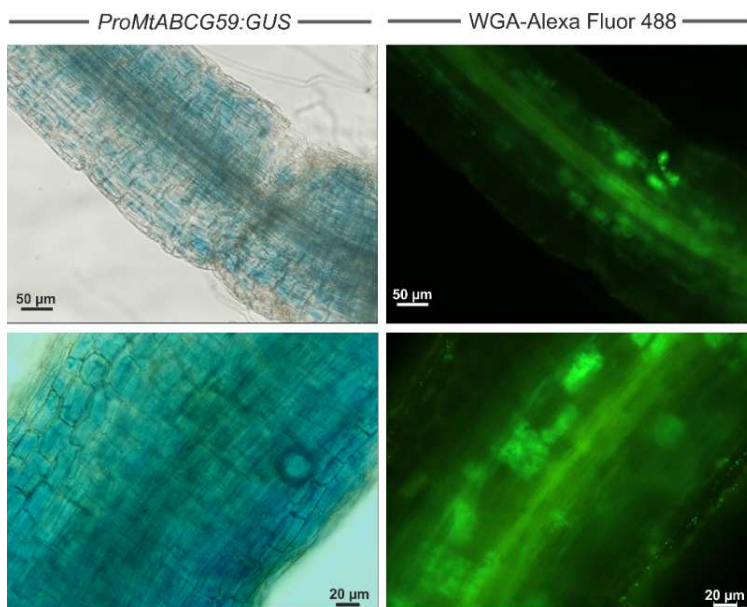

**Supplementary Figure 5.** Promoter activity analyses of *MtABCG59* in 4-week-old mycorrhizal *Medicago truncatula* roots expressing *ProMtABCG59:GUS*. Fungal structures were visualized by staining roots with WGA-AlexaFluor 488.

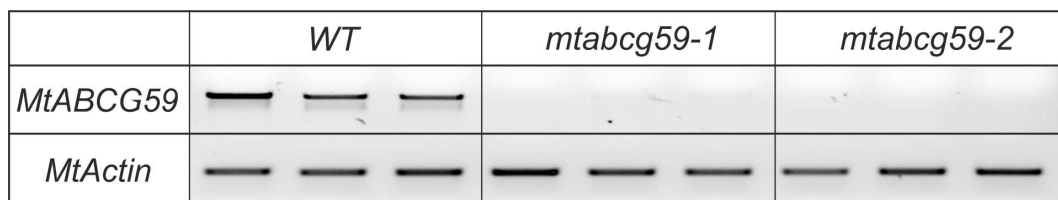

**Supplementary Figure 6. Identification of *mtabcg59* mutants.** RT-PCR analysis using a pair of primers flanking the T-DNA insertion sites did not detect *MtABCG59* expression in *mtabcg59-1* and *mtabcg59-2*, indicating that both of them are null alleles.

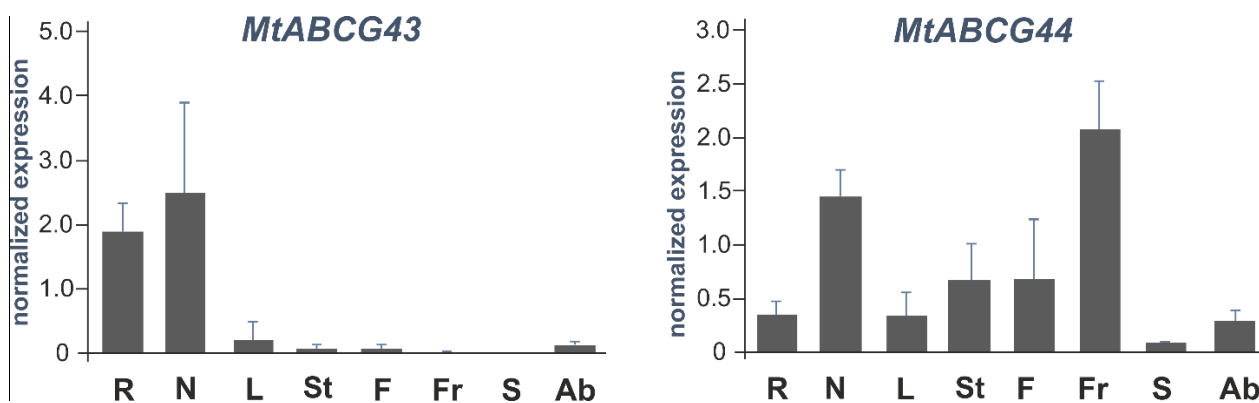

**Supplementary Figure 7.** Quantitative PCR expression analysis of *MtABCG43* and *MtABCG44* in *Medicago truncatula* organs (R-root; N-nodule; L-leaf; St-stem; F-flower; Fr-fruit; S-seed; Ab-axillary bud). The transcript levels were normalized to the actin gene. Data represent the mean  $\pm$  SD of three independent biological experiments and three technical repeats.



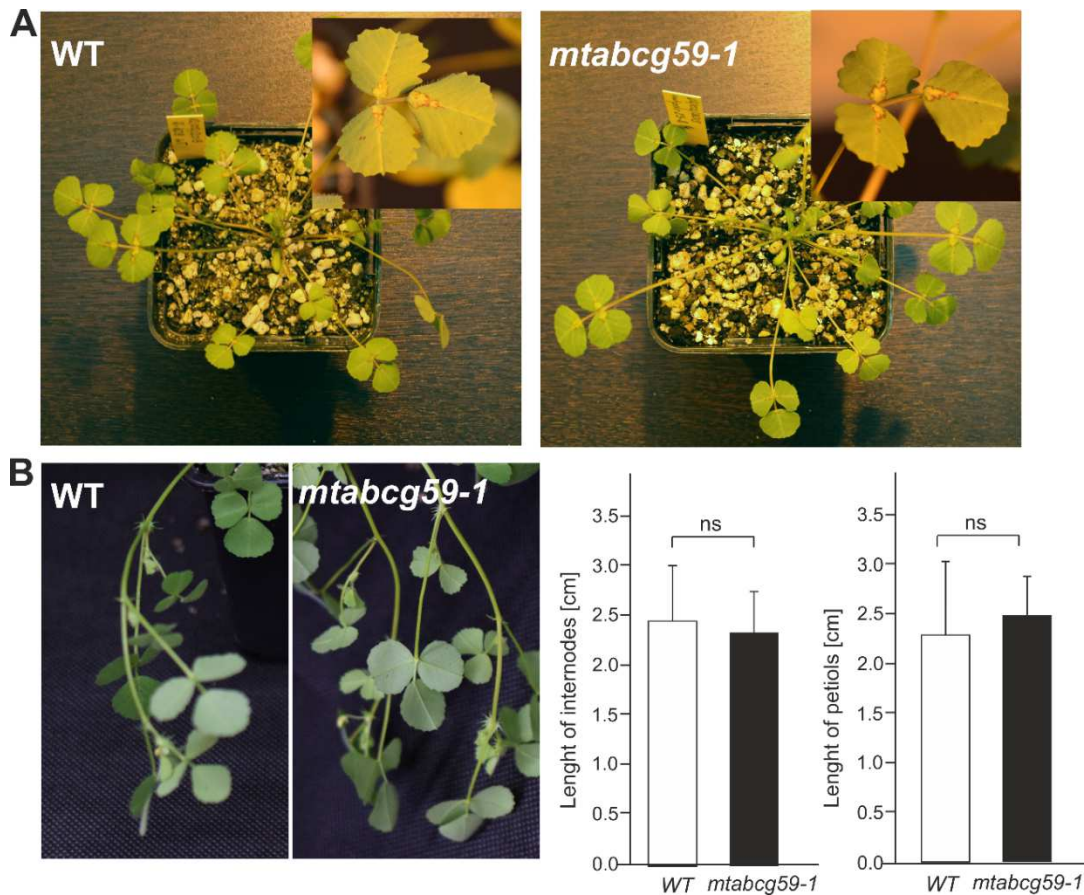

**Supplementary Figure 8. Lack of aboveground phenotype of *mtabcg59* plants.** (A) No differences in the leaf margin serrations between 4-week-old *WT* and *mtabcg59-1* plants. (B) Shoot architecture of the six-week-old plants. No differences in the internode and petioles length between 4-week-old *WT* and *mtabcg59-1* plants. Length of internodes and petioles corresponds to the mean  $\pm$  SD of  $n = 20$ .

### Supplementary Reference

- Banasiak, J., and Jasinski, M. (2014). Defence, Symbiosis and ABCG Transporters. *Plant Abc Transporters*, 163-184. doi: 10.1007/978-3-319-06511-3\_9.
- Strozycki, P.M., Skapska, A., Szczesniak, K., Sobieszczuk, E., Briat, J.F., and Legocki, A.B. (2003). Differential expression and evolutionary analysis of the three ferritin genes in the legume plant *Lupinus luteus*. *Physiologia Plantarum* 118(3), 380-389. doi: DOI 10.1034/j.1399-3054.2003.00081.x.
- Verrier, P.J., Bird, D., Burla, B., Dassa, E., Forestier, C., Geisler, M., et al. (2008). Plant ABC proteins--a unified nomenclature and updated inventory. *Trends Plant Sci* 13(4), 151-159. doi: 10.1016/j.tplants.2008.02.001.
- Zhang, X., Pumplin, N., Ivanov, S., and Harrison, M.J. (2015). EXO70I Is Required for Development of a Sub-domain of the Periarbuscular Membrane during Arbuscular Mycorrhizal Symbiosis. *Curr Biol* 25(16), 2189-2195. doi: 10.1016/j.cub.2015.06.075.
